# Supplementary material for: Plastome Structure and Phylogenetic Relationships of Styracaceae (Ericales)
Source: Research Square preprint supplement (doi:10.21203/rs.3.rs-55283/v2), 2021-01-29
Supplement: Supplementary file [file 21819050c2b299918d6f9cf5.pdf]

Table S1. The results of partitionfinder models in the study.

| Subset | Best Model | Partition names                                                                                                                                                     |
|--------|------------|---------------------------------------------------------------------------------------------------------------------------------------------------------------------|
| 1      | GTR+G      | accD_pos1                                                                                                                                                           |
| 2      | GTR+G      | accD_pos2                                                                                                                                                           |
| 3      | GTR+G      | accD_pos3                                                                                                                                                           |
| 4      | GTR+G      | atpA_pos1, petA_pos1, rpl16_pos1                                                                                                                                    |
| 5      | GTR+I+G    | atpA_pos2, rpl32_pos2, ndhI_pos1, rpoB_pos2,<br>ndhK_pos2, ndhI_pos2                                                                                                |
| 6      | GTR+G      | rpl32_pos3, rps19_pos3, rps15_pos3, ndhA_pos3,<br>atpA_pos3, rpoA_pos2                                                                                              |
| 7      | GTR+I+G    | rbcL_pos1, atpB_pos1                                                                                                                                                |
| 8      | GTR+G      | atpB_pos2, ndhH_pos2, ndhB_pos3, rps19_pos2,<br>atpE_pos2, petA_pos2                                                                                                |
| 9      | GTR+G      | atpB_pos3, petD_pos3, rpoC1_pos1                                                                                                                                    |
| 10     | GTR        | rps7_pos1, rps11_pos1, rpl14_pos1, atpE_pos1                                                                                                                        |
| 11     | GTR+G      | psbN_pos3, psbT_pos3, rpl14_pos3, atpE_pos3,<br>ndhK_pos3, rps2_pos3, ycf3_pos3, rps4_pos1                                                                          |
| 12     | GTR+G      | rpoB_pos1, atpF_pos1, rpl16_pos2, ndhJ_pos1,<br>rps14_pos2, rpoC1_pos2                                                                                              |
| 13     | GTR+G      | atpF_pos2, ycf2_pos2                                                                                                                                                |
| 14     | GTR+G      | psaA_pos1, rps15_pos2, atpF_pos3, rps7_pos3, rps3_pos2,<br>rps16_pos2                                                                                               |
| 15     | GTR        | psbB_pos1, atpH_pos1, petD_pos1, psbC_pos1                                                                                                                          |
| 16     | GTR        | petL_pos2, petN_pos2, atpH_pos2, psbH_pos2, psbJ_pos2,<br>psaJ_pos2, psbZ_pos2                                                                                      |
| 17     | GTR+G      | atpH_pos3, ndhE_pos3, petB_pos3, psaJ_pos3, petA_pos3,<br>rbcL_pos3, ndhC_pos3, ndhJ_pos3, petL_pos3                                                                |
| 18     | GTR+I+G    | atpI_pos1, rps8_pos2, ndhE_pos1, rpl36_pos2, rpl2_pos2                                                                                                              |
| 19     | GTR+I+G    | ndhD_pos2, ndhA_pos2, atpI_pos2                                                                                                                                     |
| 20     | GTR+G      | ndhD_pos3, ccsA_pos3, rpl22_pos3, ndhI_pos3, atpI_pos3,<br>matK_pos3, cemA_pos3, rps8_pos3, infA_pos3,<br>ndhG_pos3, ycf4_pos3, rps18_pos3, psbM_pos3,<br>petG_pos3 |
| 21     | GTR+G      | ccsA_pos1, ndhD_pos1, ndhA_pos1                                                                                                                                     |
| 22     | GTR+G      | ccsA_pos2, ndhF_pos2, psbD_pos3                                                                                                                                     |
| 23     | GTR        | rpl32_pos1, rpl2_pos3, infA_pos2, petN_pos3, psaI_pos3,<br>rpoC1_pos3, cemA_pos1, psaI_pos1, ycf15_pos2                                                             |
| 24     | GTR+G      | cemA_pos2, psbL_pos2                                                                                                                                                |
| 25     | GTR+G      | clpP_pos1                                                                                                                                                           |
| 26     | GTR+G      | ycf1_pos1, clpP_pos2, ycf1_pos2                                                                                                                                     |
| 27     | GTR+G      | clpP_pos3                                                                                                                                                           |

|    |         |                                                                                           |
|----|---------|-------------------------------------------------------------------------------------------|
| 28 | GTR+G   | rpl33_pos2, rps2_pos1, infA_pos1, rps19_pos1, rps8_pos1,<br>rps3_pos1                     |
| 29 | GTR+G   | matK_pos2, matK_pos1                                                                      |
| 30 | GTR+I+G | ndhB_pos1, psaA_pos2, ndhJ_pos2, rpl23_pos2                                               |
| 31 | GTR+I+G | ndhB_pos2, ndhE_pos2, ndhC_pos2, psbF_pos2,<br>petB_pos2, psbT_pos2, petD_pos2            |
| 32 | GTR     | ndhC_pos1, ycf4_pos2                                                                      |
| 33 | GTR+G   | rps16_pos1, ndhF_pos1, rpl20_pos2, rpl20_pos3                                             |
| 34 | GTR+G   | ndhF_pos3                                                                                 |
| 35 | GTR+G   | ndhG_pos1, ycf2_pos1, rps18_pos2                                                          |
| 36 | GTR+G   | psbM_pos2, psaI_pos2, psbA_pos3, ndhG_pos2,<br>psbK_pos2                                  |
| 37 | GTR+G   | rps3_pos3, ndhH_pos1, rps11_pos3, rps16_pos3,<br>rpl36_pos3, rpl16_pos3                   |
| 38 | GTR     | ndhH_pos3                                                                                 |
| 39 | GTR     | ycf15_pos3, ndhK_pos1, ycf4_pos1                                                          |
| 40 | GTR+I+G | psbA_pos1, petN_pos1, ycf3_pos1, psaC_pos1, petB_pos1,<br>rps12_pos1                      |
| 41 | GTR     | petG_pos1, psbL_pos3, psaJ_pos1, psbT_pos1                                                |
| 42 | GTR+I+G | psbI_pos1, petG_pos2, psbI_pos2                                                           |
| 43 | GTR+I+G | rpl23_pos1, ycf3_pos2, petL_pos1, rps12_pos3                                              |
| 44 | GTR+I+G | psaA_pos3                                                                                 |
| 45 | GTR     | psbN_pos1, psbD_pos1, psaB_pos1, psbE_pos1,<br>psbF_pos1                                  |
| 46 | GTR+I+G | psbE_pos2, psbB_pos2, psaB_pos2, psbC_pos2,<br>psbA_pos2, psbD_pos2, psbL_pos1, psbN_pos2 |
| 47 | GTR+G   | psbE_pos3, psbC_pos3, psaB_pos3, psbB_pos3,<br>rpl33_pos3                                 |
| 48 | GTR     | rps12_pos2, rps7_pos2, psaC_pos2, psbM_pos1,                                              |
| 49 | GTR+G   | psbH_pos3, psaC_pos3                                                                      |
| 50 | GTR     | rpl23_pos3, psbZ_pos1, psbJ_pos1, psbH_pos1,<br>rpl14_pos2, rpl33_pos1, psbF_pos3         |
| 51 | GTR     | psbI_pos3, psbK_pos3, psbJ_pos3, psbZ_pos3                                                |
| 52 | GTR+G   | psbK_pos1, rps4_pos2, rpoC2_pos2, rps2_pos2                                               |
| 53 | GTR+G   | rbcL_pos2                                                                                 |
| 54 | GTR+G   | rpl2_s_pos1, rpl2_pos1                                                                    |
| 55 | GTR+G   | rps18_pos1, rpl20_pos1, rps15_pos1, rpl22_pos2                                            |
| 56 | GTR+G   | rpl22_pos1, rps14_pos3                                                                    |
| 57 | GTR+I+G | rpl36_pos1, rps14_pos1, ycf15_pos1                                                        |
| 58 | GTR+G   | rpoA_pos1                                                                                 |
| 59 | GTR+G   | rpoA_pos3                                                                                 |
| 60 | GTR+G   | rpoC2_pos3, rpoB_pos3                                                                     |
| 61 | GTR+G   | rpoC2_pos1                                                                                |

|    |       |                       |
|----|-------|-----------------------|
| 62 | GTR+G | rps11_pos2, rps4_pos3 |
| 63 | GTR+G | ycf1_pos3             |
| 64 | GTR+G | ycf2_pos3             |

---
